# Supplementary material for: Enhanced performance in bulk heterojunction solar cells with alkylidene fluorene donor by introducing modified PFN-OH/Al bilayer cathode
Source: Royal Society of Chemistry journal article supplement (doi:10.1039/c3ra42263a), 2013-11-22
Supplement: c3ra42263a.pdf [file c3ra42263a.pdf]

## Electronic supplementary information

### Enhanced Performance in Bulk Heterojunction Solar Cells with Alkylidene Fluorene Donor by Introducing Modified PFN-OH/Al Bilayer Cathode

Soo Won Heo, Kwan Wook Song and Doo Kyung Moon \*

Department of Materials Chemistry and Engineering, Konkuk University, 1 Hwayang-dong, Gwangjin-gu, Seoul (Republic of Korea)

\* Corresponding author

E-mail: [dkmoon@konkuk.ac.kr](mailto:dkmoon@konkuk.ac.kr) (D. K. Moon)

Fax : +82-2-444-0765

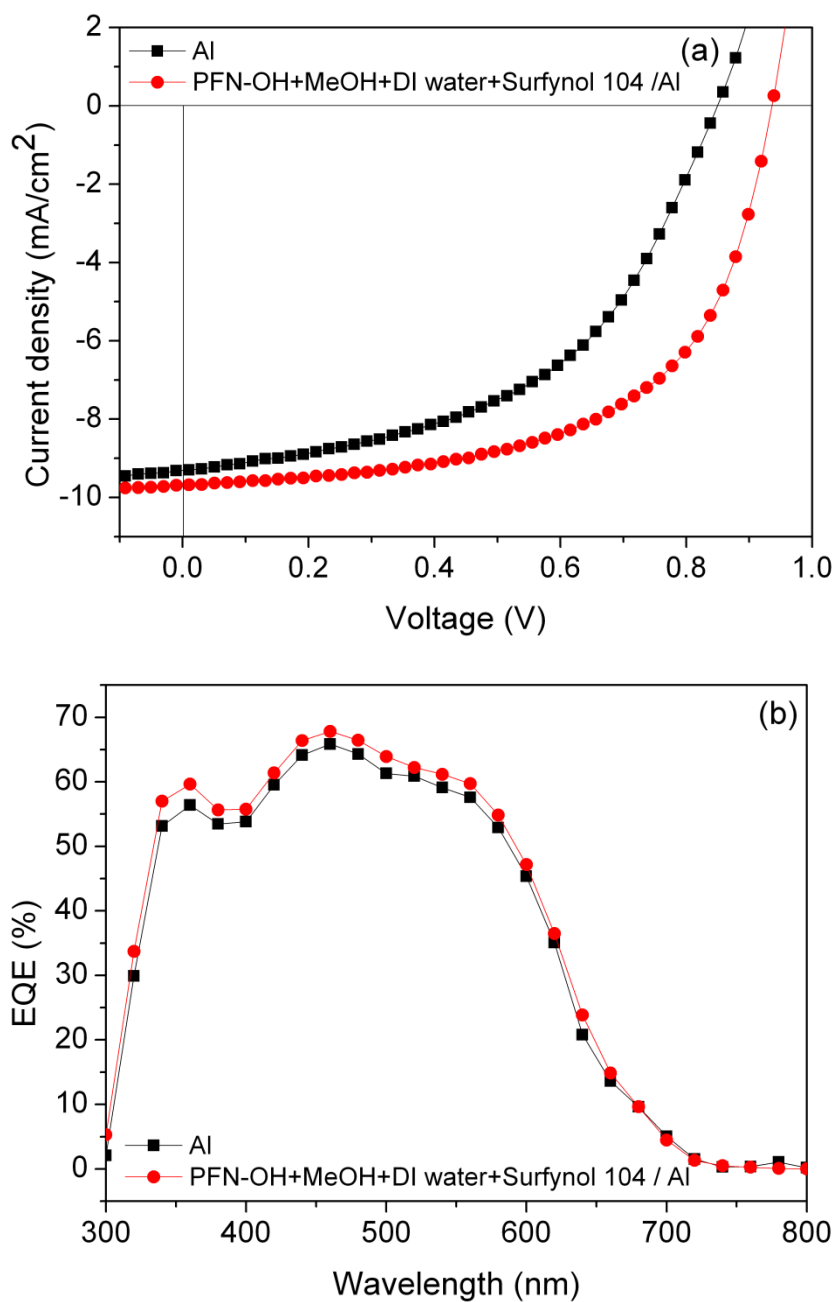

| Polymer                                    | Cathode                             | Voc[V] | Jsc[mA cm <sup>-2</sup> ] | FF[%] | PCE[%] |
|--------------------------------------------|-------------------------------------|--------|---------------------------|-------|--------|
| PCDTBT :<br>PC <sub>71</sub> BM<br>(1 : 4) | Al                                  | 0.858  | 9.3                       | 49.5  | 4.0    |
|                                            | PFN-OH+DI water+<br>Surfynol 104/Al | 0.959  | 9.7                       | 58.5  | 5.3    |

**Fig.S1** (a) J-V characteristics and (b) external quantum efficiency (EQE) characteristics of PSCs with PCDTBT:PC<sub>71</sub>BM = 1:4 as the active layer when using Al and modified PFN-OH /Al cathodes.

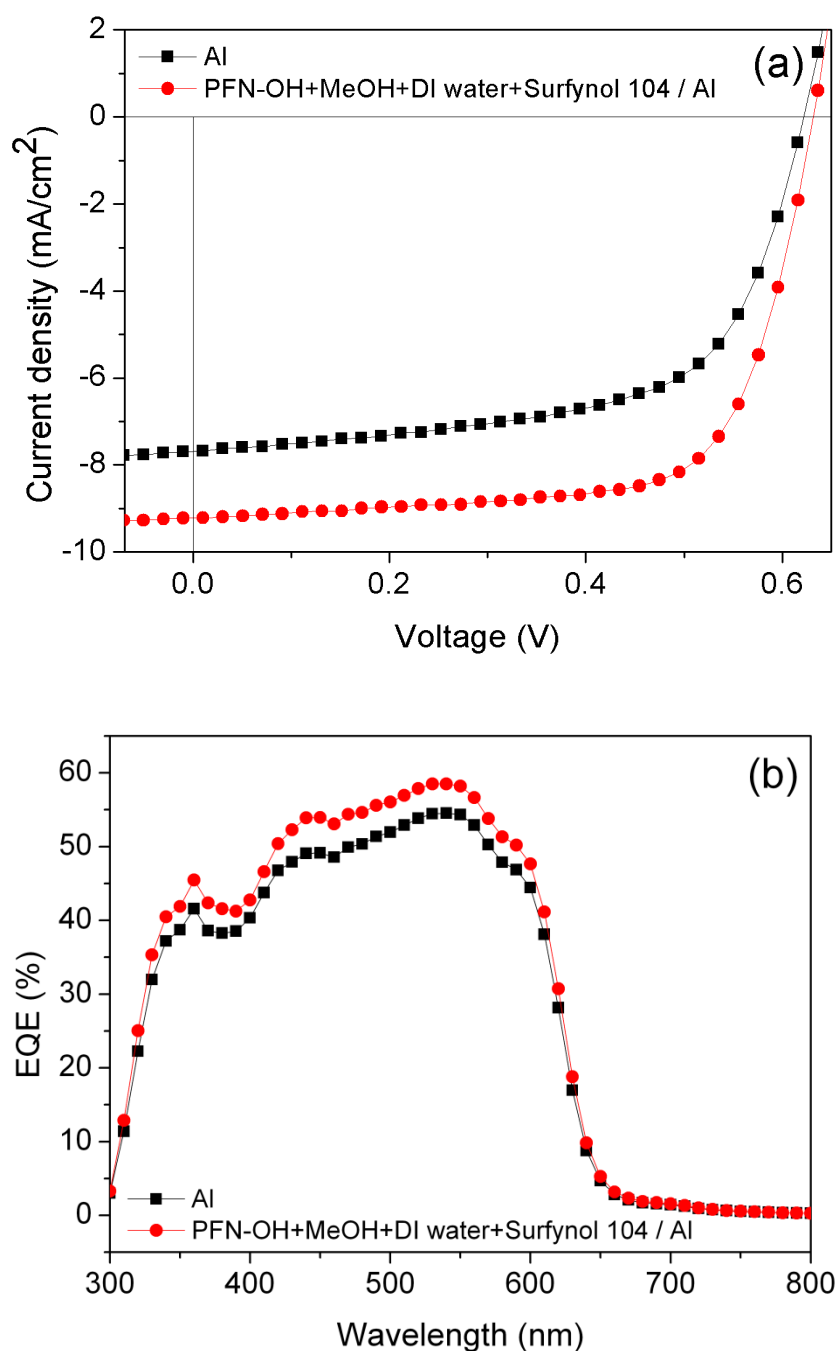

| Polymer                                    | Cathode                             | Voc[V] | Jsc[mA cm <sup>-2</sup> ] | FF[%] | PCE[%] |
|--------------------------------------------|-------------------------------------|--------|---------------------------|-------|--------|
| P3HT :<br>PC <sub>61</sub> BM<br>(1 : 0.6) | Al                                  | 0.616  | 7.7                       | 62.6  | 3.0    |
|                                            | PFN-OH+DI water+<br>Surfynol 104/Al | 0.621  | 9.2                       | 68.6  | 3.9    |

**Fig.S2** (a) J-V characteristics and (b) external quantum efficiency (EQE) characteristics of PSCs with P3HT:PC<sub>61</sub>BM = 1:0.6 as the active layer when using Al and modified PFN-OH /Al cathodes.

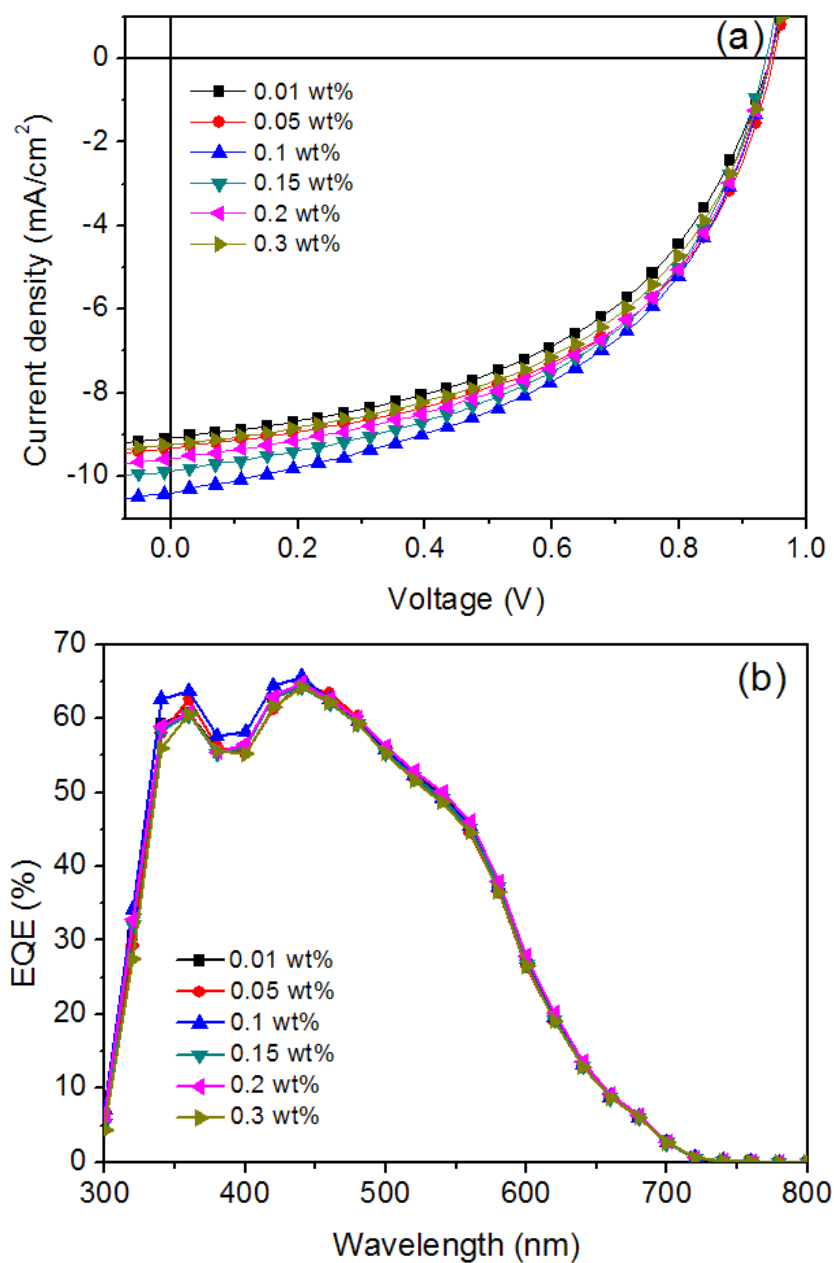

| Surfynol 104 | Voc[V] | Jsc[mA/cm <sup>2</sup> ] | FF[%] | PCE[%] |
|--------------|--------|--------------------------|-------|--------|
| 0.01 wt%     | 0.939  | 9.1                      | 49.2  | 4.2    |
| 0.05 wt%     | 0.939  | 9.3                      | 51.6  | 4.5    |
| 0.1 wt%      | 0.939  | 10.5                     | 49    | 4.8    |
| 0.15 wt%     | 0.939  | 9.8                      | 49.7  | 4.6    |
| 0.2 wt%      | 0.939  | 9.5                      | 50.7  | 4.5    |
| 0.3 wt%      | 0.939  | 9.2                      | 50.2  | 4.4    |

**Fig.S3** (a) J-V characteristics and (b) external quantum efficiency (EQE) characteristics of PSCs with PAFBToBT:PC<sub>71</sub>BM = 1:4 as the active layer when introducing an interfacial layer with various concentrations of Surfynol 104 into PFN-OH+methanol solution.

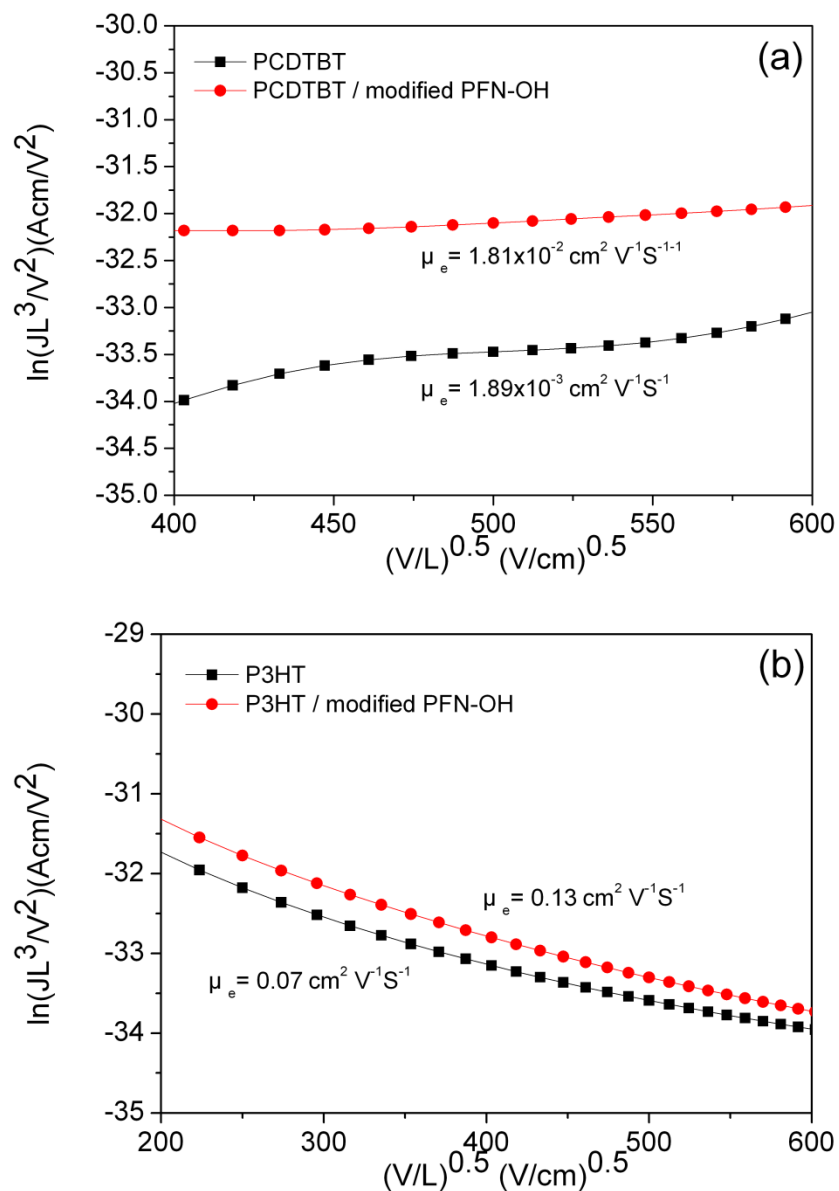

**Fig.S4** The logarithm of  $JL^3/V^2$  versus the square root of the mean electric field of electron-only devices measured in the dark. (a) PCDTBT, and (b) P3HT.
